# Supplementary material for: Effect of pH and Concentration of Dopamine Solution on the Deposited Polydopamine Film and the Prepared Graphene-like Material
Source: MDPI journal article supplement (doi:10.3390/cryst13040607), 2023-04-02
Supplement: s1 [file s1]

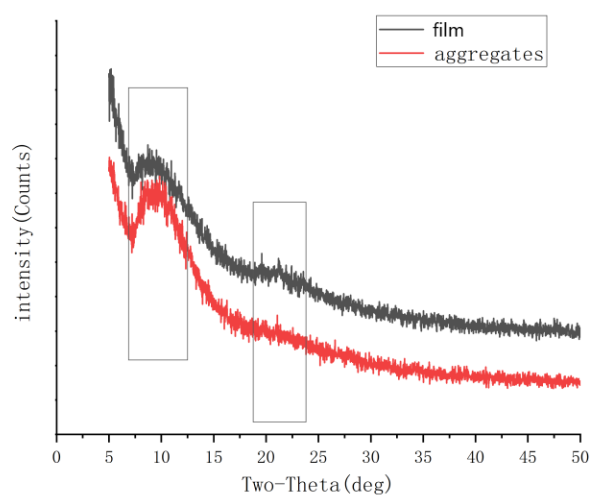

**Figure S1** XRD curves of the smooth areas of the film and the surface aggregates

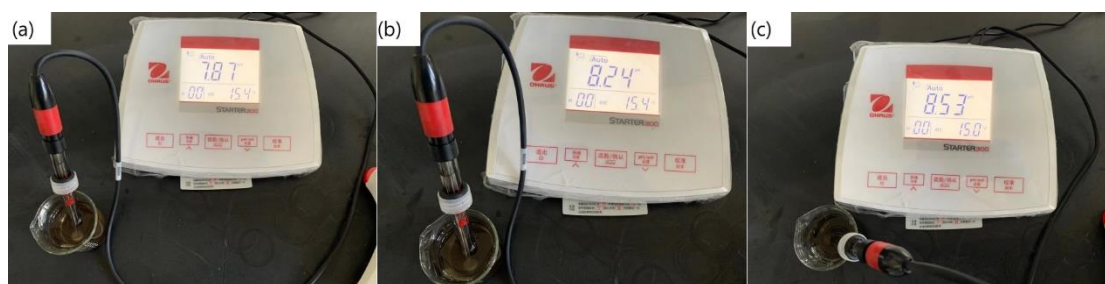

**Figure S2** pH value detection of each reaction solution, (a) pH = 7.9, (b) pH = 8.2 and (c) pH = 8.5

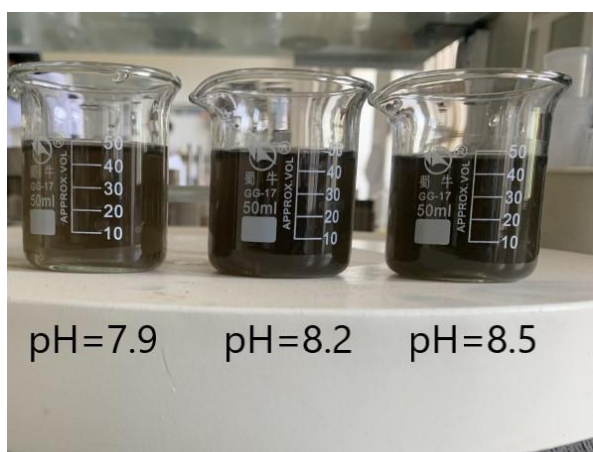

**Figure S3** Color comparison of the deposition solutions after 90min in dark environment

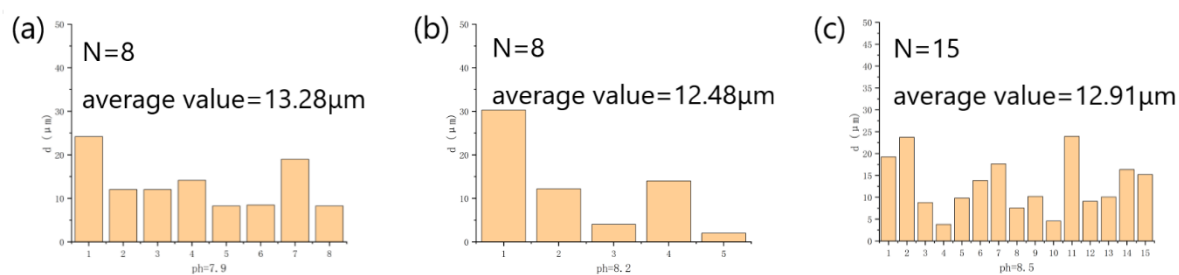

**Figure S4** The size and quantity of the aggregates calculated based on the surface SEM images (50 $\times$ ) of the same thickness PDA films deposited for different time length on  $\text{SiO}_2$  substrates under (a) pH = 7.9, (b) pH = 8.2 and (c) pH = 8.5

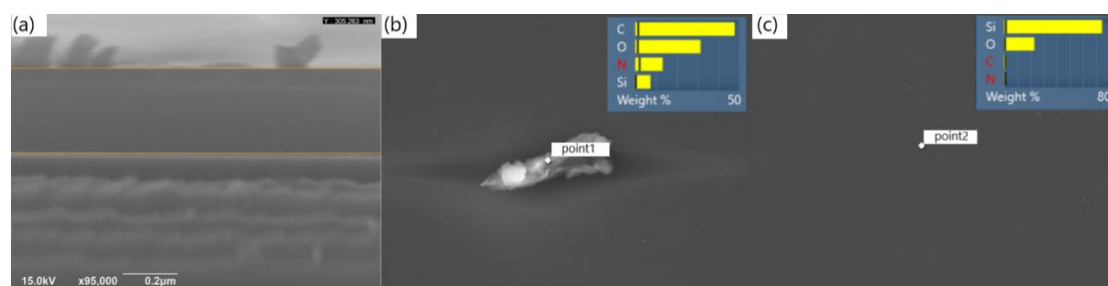

**Figure S5** (a) SEM images of cross-sections of the PDA films prepared on  $\text{SiO}_2$  substrates at a concentration of 0.5 mg/ml; EDS analysis on (b) the aggregated particle and (c) on the smooth area of the film (without aggregates)

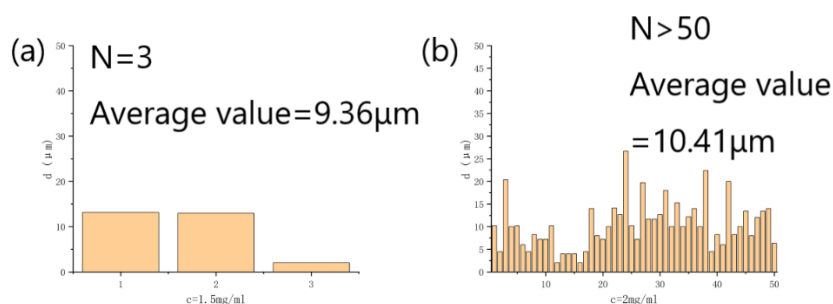

**Figure S6** Statistical graph of particle size and quantity of surface aggregates calculated through the 50 $\times$  magnified SEM images of films deposited under (a)  $c = 1.5 \text{ mg/ml}$  and (b)  $c = 2 \text{ mg/ml}$

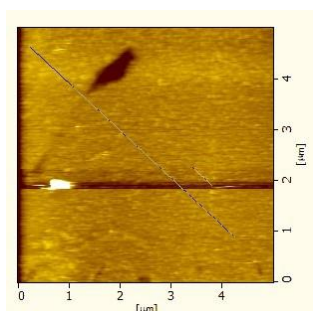

**Figure S7** The surface AFM image and the test position for figure 6(g)
